# Supplementary material
Source: PubMed Central journal article supplement (PMC7301301)
Supplement: jamasurg-155-723-s001.pdf [file jamasurg-155-723-s001.pdf]

## Supplementary Online Content

Williamson T, Ryser MD, Ubel PA, et al. Withdrawal of life-supporting treatment in severe traumatic brain injury. *JAMA Surg*. Published online June 17, 2020.  
doi:10.1001/jamasurg.2020.1790

**eTable 1.** Odds ratio estimates for interaction effects for withdrawal of life-supporting treatment

**eTable 2.** Withdrawal of life-supporting treatment by age <65 and ≥65 years old for each payment type

This supplementary material has been provided by the authors to give readers additional information about their work.

**eTable 1. Odds ratio estimates for interaction effects for withdrawal of life-supporting treatment.**

| Interaction                             | Odds Ratio (95% CI) | P value |
|-----------------------------------------|---------------------|---------|
| ISS group by GCS group                  |                     |         |
| ISS <12 by GCS 3-4 vs. 7-8              | 3.51 (1.66-7.43)    | .001    |
| ISS 12-24 by GCS 3-4 vs. 7-8            | 3.50 (2.85-4.29)    | <.001   |
| ISS >24 by GCS 3-4 vs. 7-8              | 2.53 (2.09-3.06)    | <.001   |
| GCS group by ISS group                  |                     |         |
| GCS 3-4 by ISS <12 vs. >24              | 0.17 (0.13-0.22)    | <.001   |
| GCS 5-6 by ISS <12 vs. >24              | 0.13 (0.07-0.26)    | <.001   |
| GCS 7-8 by ISS <12 vs. >24              | 0.12 (0.06-0.24)    | <.001   |
| GCS group by Craniotomy group           |                     |         |
| GCS 3-4 by Craniotomy vs. No craniotomy | 1.24 (1.14-1.35)    | <.001   |
| GCS 5-6 by Craniotomy vs. No craniotomy | 2.15 (1.69-2.73)    | <.001   |
| GCS 7-8 by Craniotomy vs. No craniotomy | 1.58 (1.20-2.07)    | .001    |
| GCS group by Age group                  |                     |         |
| GCS 3-4 by >75 y vs. <30 y              | 7.09 (6.27-8.01)    | <.001   |
| GCS 5-6 by >75 y vs. <30 y              | 18.89 (13.32-26.79) | <.001   |
| GCS 7-8 by >75 y vs. <30 y              | 20.54 (13.29-31.76) | <.001   |

Only comparisons of the most extreme groups in each category are included in this table. CI: Confidence interval; GCS: Glasgow Coma Scale; ISS: Injury Severity Score.

**eTable 2. Withdrawal of life-supporting treatment by age <65 and ≥65 years old for each payment type.**

| <b>Payment Status</b>        | <b>&lt;65 Years Old, No. (%)</b> | <b>≥65 Years Old, No. (%)</b> |
|------------------------------|----------------------------------|-------------------------------|
| Medicaid                     |                                  |                               |
| Total patients               | 5162 (97.2)                      | 147 (2.8)                     |
| Patients with WLST           | 651 (12.6)                       | 47 (32.0)                     |
| Medicare                     |                                  |                               |
| Total patients               | 1630 (22.7)                      | 5542 (77.3)                   |
| Patients with WLST           | 388 (23.8)                       | 2469 (44.6)                   |
| Private/commercial insurance |                                  |                               |
| Total patients               | 12763 (90.5)                     | 1332 (9.5)                    |
| Patients with WLST           | 1856 (14.5)                      | 470 (35.3)                    |
| Self-pay                     |                                  |                               |
| Total patients               | 6382 (95.5)                      | 298 (4.5)                     |
| Patients with WLST           | 1078 (16.9)                      | 123 (41.3)                    |
| Other                        |                                  |                               |
| Total patients               | 2545 (89.8)                      | 290 (10.2)                    |
| Patients with WLST           | 366 (14.4)                       | 99 (34.1)                     |
| Total                        |                                  |                               |
| Total patients               | 28482 (75.1)                     | 7609 (20.1)                   |
| Patients with WLST           | 4339 (15.2)                      | 3208 (42.2)                   |

Proportion of patients with withdrawal of life-supporting treatment for each payment type, grouped by age <65 years old and ≥65 years old. WLST: Withdrawal of life-supporting treatment.
